# Supplementary material for: Access to HIV care in the context of universal test and treat: challenges within the ANRS 12249 TasP cluster-randomized trial in rural South Africa
Source: PubMed Central journal article supplement (PMC4891946; doi:10.7448/ias.19.1.20913), 2016-06-01
Supplement: JIAS-19-20913-s001.pdf [file JIAS-19-20913-s001.pdf]

## APPENDIX 1.

**Table S1.** P-value of interaction with sex and with HIV care status at referral (N=1218 – complete data)

| Variable                                       | p-value interaction | p-value interaction |
|------------------------------------------------|---------------------|---------------------|
|                                                | Sex                 | Status at referral  |
| HIV care status at referral                    | 0.81                | /                   |
| Sex                                            | /                   | 0.81                |
| Age at referral                                | 0.11                | 0.05                |
| Education level                                | 0.64                | 0.12                |
| Occupational status                            | 0.67                | 0.73                |
| Household wealth assets                        | 0.17                | 0.17                |
| Knowing HIV+ family member                     | 0.89                | 0.88                |
| Would take ARV if diagnosed HIV+               | 0.99                | 0.79                |
| Think that people avoid HIV+ individuals       | 0.80                | 0.78                |
| Think that people don't blame HIV+ individuals | 0.99                | 0.12                |
| Distance to the closest TasP clinic            | 0.44                | 0.32                |
| Calendar round at referral                     | 0.56                | 0.36                |

## APPENDIX 2.

**Table S2.** Baseline variables associated with inclusion/exclusion status

|                                    | Included<br>(N=1222) |        | Excluded |        | p            |
|------------------------------------|----------------------|--------|----------|--------|--------------|
|                                    | n                    | (%)    | n        | (%)    |              |
| <b>HIV care status at referral</b> | <i>(N=101)</i>       |        |          |        |              |
| Never in care, newly diagnosed     | 529                  | (42.0) | 38       | (37.6) | <i>0.002</i> |
| Never in care, already diagnosed   | 304                  | (25.0) | 42       | (41.6) |              |
| LTFU >24 months                    | 194                  | (15.9) | 8        | (7.9)  |              |
| LTFU 13-24 months                  | 195                  | (16.0) | 13       | (12.9) |              |
| <b>Sex</b>                         | <i>(N=101)</i>       |        |          |        |              |
| Male                               | 336                  | (27.5) | 22       | (21.8) | <i>0.21</i>  |
| Female                             | 886                  | (72.5) | 79       | (78.2) |              |
| <b>Age at referral (years)</b>     | <i>(N=57)</i>        |        |          |        |              |
| 16-19                              | 75                   | (6.1)  | 3        | (5.3)  | <i>0.33</i>  |
| 20-29                              | 437                  | (35.8) | 27       | (47.4) |              |
| 30-39                              | 340                  | (27.9) | 15       | (26.3) |              |
| 40-49                              | 185                  | (15.3) | 4        | (7.0)  |              |
| 50-84                              | 185                  | (15.1) | 8        | (14.0) |              |
| <b>Education level</b>             | <i>(N=92)</i>        |        |          |        |              |
| Primary or less                    | 455                  | (37.2) | 36       | (39.1) | <i>0.66</i>  |
| Some secondary                     | 407                  | (33.3) | 33       | (35.9) |              |
| At least completed secondary       | 360                  | (29.5) | 23       | (25.0) |              |
| <b>Occupational status</b>         | <i>(N=82)</i>        |        |          |        |              |
| Employed                           | 200                  | (16.4) | 10       | (12.2) | <i>0.61</i>  |
| Student                            | 102                  | (8.3)  | 7        | (8.5)  |              |
| Inactive                           | 920                  | (75.3) | 65       | (79.3) |              |
| <b>Household wealth assets</b>     | <i>(N=90)</i>        |        |          |        |              |
| Low                                | 438                  | (35.8) | 31       | (34.4) | <i>0.91</i>  |
| Middle                             | 515                  | (42.2) | 40       | (44.5) |              |
| High                               | 269                  | (22.0) | 19       | (21.1) |              |
| <b>Knowing HIV+ family member</b>  | <i>(N=96)</i>        |        |          |        |              |

|                                                       |      |        |         |        |      |
|-------------------------------------------------------|------|--------|---------|--------|------|
| No                                                    | 764  | (62.5) | 63      | (65.6) | 0.55 |
| Yes                                                   | 458  | (37.5) | 33      | (34.4) |      |
| <b>Would take ARV if diagnosed HIV+</b>               |      |        | (N=82)  |        |      |
| Agree                                                 | 1141 | (93.4) | 75      | (91.5) | 0.49 |
| Disagree                                              | 59   | (4.8)  | 4       | (4.9)  |      |
| Don't know                                            | 22   | (1.8)  | 3       | (3.7)  |      |
| <b>Think that people avoid HIV+ individuals</b>       |      |        | (N=82)  |        |      |
| Agree                                                 | 446  | (36.5) | 24      | (29.3) | 0.17 |
| Disagree                                              | 652  | (53.4) | 45      | (54.9) |      |
| Don't know                                            | 124  | (10.1) | 13      | (15.8) |      |
| <b>Think that people don't blame HIV+ individuals</b> |      |        | (N=86)  |        |      |
| Agree                                                 | 661  | (54.1) | 46      | (53.5) | 0.09 |
| Disagree                                              | 424  | (34.7) | 24      | (27.9) |      |
| Don't know                                            | 137  | (11.2) | 16      | (18.6) |      |
| <b>Distance from home to the closest TasP clinic</b>  |      |        | (N=101) |        |      |
| 0-1 km                                                | 447  | (36.6) | 39      | (38.6) | 0.92 |
| 1-2 km                                                | 433  | (35.4) | 35      | (34.7) |      |
| 2-5 km                                                | 342  | (28.0) | 27      | (26.7) |      |
| <b>Calendar Round at referral</b>                     |      |        | (N=101) |        |      |
| CR1                                                   | 734  | (60.1) | 59      | (58.4) | 0.75 |
| CR2/CR3                                               | 488  | (39.9) | 42      | (41.6) |      |
| <b>Trial arm</b>                                      |      |        | (N=101) |        |      |
| Control                                               | 672  | (55.0) | 45      | (44.5) | 0.05 |
| Intervention                                          | 550  | (45.0) | 56      | (55.5) |      |

---

### APPENDIX 3.

**Table S3. Composition of the TasP Study Group**

| <b>Name</b>          | <b>Role</b>                                        | <b>Affiliation</b>                                                                                                                                                                                           |
|----------------------|----------------------------------------------------|--------------------------------------------------------------------------------------------------------------------------------------------------------------------------------------------------------------|
| <b>Investigators</b> |                                                    |                                                                                                                                                                                                              |
| François Dabis       | Co-PI (France)                                     | - Univ. Bordeaux, ISPED, Centre Inserm U897- Epidemiologie-Biostatistique, Bordeaux, France<br>- INSERM, ISPED, Centre Inserm U897- Epidemiologie-Biostatistique, Bordeaux, France                           |
| Marie-Louise Newell  | Co-PI (United Kingdom)                             | - Africa Centre for Health and Population Studies, University of KwaZulu-Natal, South Africa<br>- Faculty of Medicine, University of Southampton, UK                                                         |
| Deenan Pillay        | Co-PI (South Africa)                               | - Africa Centre for Health and Population Studies, University of KwaZulu-Natal, South Africa<br>- Faculty of Medical Sciences, University College London, UK                                                 |
| <b>Coordinators</b>  |                                                    |                                                                                                                                                                                                              |
| Collins Iwuji        | Trial Coordinator and HIV Physician (South Africa) | - Africa Centre for Health and Population Studies, University of KwaZulu-Natal, South Africa<br>- Research Department of Infection and Population Health, University College London, UK                      |
| Joanna Orne-Gliemann | Trial Coordinator (France)                         | - Univ. Bordeaux, ISPED, Centre Inserm U897- Epidemiologie-Biostatistique, Bordeaux, France<br>- INSERM, ISPED, Centre Inserm U897- Epidemiologie-Biostatistique, Bordeaux, France                           |
| <b>Study team</b>    |                                                    |                                                                                                                                                                                                              |
| Till Bärnighausen    | Health economics                                   | - Africa Centre for Health and Population Studies, University of KwaZulu-Natal, South Africa<br>- Dept of Global Health & Population, Harvard School of Public Health, Harvard Univ. Boston                  |
| Eric Balestre        | Epidemiology and Biostatistics                     | - Univ. Bordeaux, ISPED, Centre Inserm U897- Epidemiologie-Biostatistique, Bordeaux, France<br>- INSERM, ISPED, Centre Inserm U897- Epidemiologie-Biostatistique, Bordeaux, France                           |
| Sylvie Boyer         | Health economics                                   | - INSERM, UMR912 (SESSTIM), Marseille, France<br>- Aix Marseille Université, UMR_S912, IRD, Marseille, France<br>- ORS PACA, Observatoire Régional de la Santé Provence-Alpes-Côte d'Azur, Marseille, France |
| Alexandra Calmy      | Adult Medicine                                     | - Service des maladies infectieuses, Hôpital Universitaire de Geneve, Genève.                                                                                                                                |
| Vincent Calvez       | Virology                                           | - Department of virology, Hôpital Pitié-Salpêtrière, Paris, France                                                                                                                                           |
| Marie-Laure Chaix    | Virology                                           | - EA 3620, Université Paris-Descartes, Laboratoire de Virologie, Hôpital Necker-Enfants Malades, AP-HP, Paris                                                                                                |
| Rosemary Dray-Spira  | Social sciences                                    | - INSERM U1018, CESP, Epidemiology of Occupational and Social Determinants of Health, Villejuif, France                                                                                                      |

|                         |                              |                                                                                                                                                                                                                                                                                                             |
|-------------------------|------------------------------|-------------------------------------------------------------------------------------------------------------------------------------------------------------------------------------------------------------------------------------------------------------------------------------------------------------|
| Kamal ElFarouki         | Social sciences              | <ul style="list-style-type: none"> <li>- University of Versailles Saint-Quentin, UMRS 1018, Villejuif, France</li> <li>- INSERM U1018, CESP, Epidemiology of Occupational and Social Determinants of Health, Villejuif, France</li> </ul>                                                                   |
| Kenneth Freedberg       | Modelling                    | <ul style="list-style-type: none"> <li>- University of Versailles Saint-Quentin, UMRS 1018, Villejuif, France</li> <li>- Massachusetts General Hospital, Harvard Medical School, Boston, MA, USA.</li> </ul>                                                                                                |
| Kobus Herbst            | Data management              | <ul style="list-style-type: none"> <li>- Africa Centre for Health and Population Studies, University of KwaZulu-Natal, South Africa</li> </ul>                                                                                                                                                              |
| John Imrie              | Social sciences              | <ul style="list-style-type: none"> <li>- Futures Group, Johannesburg, South Africa</li> <li>- Centre for Sexual Health and HIV Research, Research Department of Infection and Population, Faculty of Population Health Sciences, University College London, London, UK</li> </ul>                           |
| Sophie Karcher          | Data management              | <ul style="list-style-type: none"> <li>- Univ. Bordeaux, ISPED, Centre Inserm U897- Epidemiologie-Biostatistique, Bordeaux, France</li> <li>- INSERM, ISPED, Centre Inserm U897- Epidemiologie-Biostatistique, Bordeaux, France</li> </ul>                                                                  |
| Joseph Larmarange       | Social sciences              | <ul style="list-style-type: none"> <li>- CEPED (Centre Population &amp; Développement-UMR 196-Paris Descartes/INED/IRD), IRD (Institut de Recherche pour le Développement), Paris, France.</li> <li>- Africa Centre for Health and Population Studies, University of KwaZulu-Natal, South Africa</li> </ul> |
| France Lert             | Social Sciences              | <ul style="list-style-type: none"> <li>- INSERM U1018, CESP, Epidemiology of Occupational and Social Determinants of Health, Villejuif, France</li> <li>- University of Versailles Saint-Quentin, UMRS 1018, Villejuif, France</li> </ul>                                                                   |
| Richard Lessells        | Adult medicine               | <ul style="list-style-type: none"> <li>- London School of Hygiene and Tropical Medicine, UK</li> </ul>                                                                                                                                                                                                      |
| Thembisa Makowa         | Field operations             | <ul style="list-style-type: none"> <li>- Africa Centre for Health and Population Studies, University of KwaZulu-Natal, South Africa</li> </ul>                                                                                                                                                              |
| Anne-Geneviève Marcelin | Virology                     | <ul style="list-style-type: none"> <li>- Department of virology, Hôpital Pitié-Salpêtrière, Paris, France</li> </ul>                                                                                                                                                                                        |
| Laura March             | Health economics             | <ul style="list-style-type: none"> <li>- INSERM, UMR912 (SESSTIM), Marseille, France</li> <li>- Aix Marseille Université, UMR_S912, IRD, Marseille, France</li> <li>- ORS PACA, Observatoire Régional de la Santé Provence-Alpes-Côte d'Azur, Marseille, France</li> </ul>                                  |
| Nuala McGrath           | Epidemiology/Social sciences | <ul style="list-style-type: none"> <li>- Academic Unit of Primary Care and Population Sciences, and Department of Social statistics and Demography, University of Southampton, United Kingdom</li> </ul>                                                                                                    |
| Kevi Naidu              | Adult medicine               | <ul style="list-style-type: none"> <li>- Africa Centre for Health and Population Studies, University of KwaZulu-Natal, South Africa</li> </ul>                                                                                                                                                              |
| Colin Newell            | Data management              | <ul style="list-style-type: none"> <li>- Africa Centre for Health and Population Studies, University of KwaZulu-Natal, South Africa</li> </ul>                                                                                                                                                              |
| Nonhlanhla Okesola      | Nurse manager                | <ul style="list-style-type: none"> <li>- Africa Centre for Health and Population Studies, University of KwaZulu-Natal, South Africa</li> </ul>                                                                                                                                                              |
| Tulio de Oliveira       | Bioinformatics               | <ul style="list-style-type: none"> <li>- Africa Centre for Health and Population Studies, University of KwaZulu-Natal, South Africa</li> </ul>                                                                                                                                                              |
| Melanie Plazy           | Epidemiology/social sciences | <ul style="list-style-type: none"> <li>- Univ. Bordeaux, ISPED, Centre Inserm U897- Epidemiologie-Biostatistique, Bordeaux, France</li> </ul>                                                                                                                                                               |

|                   |                                |                                                                                                                                                                                                                                                                                                                     |
|-------------------|--------------------------------|---------------------------------------------------------------------------------------------------------------------------------------------------------------------------------------------------------------------------------------------------------------------------------------------------------------------|
| Tamsen Rochat     | Anthropology/psychology        | - INSERM, ISPED, Centre Inserm U897- Epidemiologie-Biostatistique, Bordeaux, France                                                                                                                                                                                                                                 |
| Bruno Spire       | Health economics               | - Africa Centre for Health and Population Studies, University of KwaZulu-Natal, South Africa<br>- INSERM, UMR912 (SESSTIM), 13006, Marseille, France<br>- Aix Marseille Université, UMR_S912, IRD, Marseille, France<br>- ORS PACA, Observatoire Régional de la Santé Provence-Alpes-Côte d'Azur, Marseille, France |
| Frank Tanser      | Epidemiology and Biostatistics | - Africa Centre for Health and Population Studies, University of KwaZulu-Natal, South Africa                                                                                                                                                                                                                        |
| Rodolphe Thiébaud | Epidemiology and Biostatistics | - Univ. Bordeaux, ISPED, Centre Inserm U897- Epidemiologie-Biostatistique, Bordeaux, France<br>- INSERM, ISPED, Centre Inserm U897- Epidemiologie-Biostatistique, Bordeaux, France                                                                                                                                  |
| Johannes Viljoen  | Virology                       | - Africa Centre for Health and Population Studies, University of KwaZulu-Natal, South Africa                                                                                                                                                                                                                        |
| Thembele Zuma     | Psychology/Social sciences     | - Africa Centre for Health and Population Studies, University of KwaZulu-Natal, South Africa                                                                                                                                                                                                                        |

---

### Scientific advisory board

- Chair: Bernard Hirschel (Switzerland)
- International experts: Xavier Anglaret (Ivory Coast), Hoosen Coovadia (South Africa), Alpha Diallo (France), Bruno Giraudeau (France), Jean-Michel Molina (France), Lynn Morris (South Africa), François Venter (South Africa), Sibongile Zungu (South Africa)
- Community representatives: Eric Fleutelot (France), Eric Goemaere (South Africa), Calice Talom (Cameroon)
- Sponsor representatives (ANRS): Brigitte Bazin, Claire Rekecwicz
- Pharmaceutical company representatives: Golriz Pahlavan-Grumel (MSD), Alice Jacob (Gilead)

### Data safety and monitoring board

- Chair: Patrick Yeni (France)
- Members: Sinead Delany-Moretlwe (South Africa), Nathan Ford (South Africa), Catherine Hankins (Netherlands), Helen Weiss (UK)
